# Supplementary material for: Investigations on the Potential of Optical Coherence Tomography as an Imaging Tool for Eustachian Tube
Source: Research Square preprint supplement (doi:10.21203/rs.3.rs-118445/v1), 2020-12-09
Supplement: Supplementary file 1 [file 5446d16974b7877b8d120d5f.docx]

**Additional information**

 We confirm that all methods were carried out in accordance with relevant guidelines and regulations. Authors declare that they have no competing financial interests.
